# Supplementary material for: Stereospecific lasofoxifene derivatives reveal the interplay between estrogen receptor alpha stability and antagonistic activity in ESR1 mutant breast cancer cells
Source: eLife journal article supplement (doi:10.7554/elife.72512), 2022-05-16
Supplement: supp [file elife_poa_e72512_Figure_4_source_data_1.docx]

**Figure 4-source data 1:** IC50 of SRC1 receptor interacting domain binding to WT and mutant ERα. The s.e.m. values for IC50s were all within 50% except for D538G with AZD9496 (52%).

| **Ligand** | **Protein** | **IC50 (nM)** | **R2** |
| --- | --- | --- | --- |
| **ICI** | WT | 17.8 | 0.90 |
| Y537S | 42.9 | 0.92 |
| D538G | 38.1 | 0.93 |
| **GDC0927** | WT | 254 | 0.86 |
| Y537S | 1,961 | 0.74 |
| D538G | 1,273 | 0.82 |
| **LA-Deg** | WT | 49.9 | 0.93 |
| Y537S | 334 | 0.93 |
| D538G | 240 | 0.93 |
| **LA-Stab** | WT | 70.4 | 0.92 |
| Y537S | 344 | 0.91 |
| D538G | 266 | 0.90 |
| **RAL** | WT | 32.4 | 0.92 |
| Y537S | 189 | 0.90 |
| D538G | 166 | 0.93 |
| **AZD9496** | WT | 1.7 | 0.92 |
| Y537S | 12.2 | 0.95 |
| D538G | 13.5 | 0.95 |
| **4OHT** | WT | 51.0 | 0.90 |
| Y537S | 255 | 0.994 |
| D538G | 202 | 0.95 |
